# Supplementary material for: PyESPERv1.01.01: A Python implementation of empirical seawater property estimation routines (ESPERs)
Source: Copernicus journal article supplement (doi:10.5194/egusphere-2025-458), 2025-04-11
Supplement: Supplementary file [file egusphere-2025-458-AC4-supplement.pdf]

# *Review of “PyESPERv1.01.01: A Python implementation of empirical seawater property estimation routines (ESPERs)” by L.M. Dias and B.R. Carter*

*28<sup>th</sup> May 2025*

*Note: Also see Git commits and notes from Matthew email*

## *Overview*

*[1] This manuscript presents a Python implementation of an existing MATLAB tool to estimate values for various marine carbonate system and nutrient parameters in seawater. There is no new development of the tool here. The aim is a direct translation. This is a valuable goal, because unlike MATLAB, Python is free and open source. But it does mean that, in my opinion, the quality of the code itself is equally as important as (or even more important than) the manuscript when assessing this submission. The manuscript is primarily describing the new code, so the new code must be complete before publication. I do not think that the code in its current form is complete, usable and publishable, but I think it is possible for this to be achieved within the scope of revisions to this submission (manuscript and code).*

**We thank you for the constructive comment and agree that the code can be greatly improved quickly with a few minor fixes prior to publication, especially with your advice below and on GitHub.**

*[2] My sense from looking through the other reviews is that they are mostly focused on the manuscript rather than the code, so this review deliberately focuses mostly on the code rather than the manuscript.*

**We appreciate the coding expertise.**

*[3] Although my comments may read as being rather critical, they are all intended to be constructive and I am overall really positive about this manuscript and (more importantly) the code. I'm very happy to see it appear in Python and it's certainly something that I could see myself using in the future. Thank you to the authors for their eKorts!*

**We thank you for the constructive comment.**

## *MATLAB-Python differences*

*[4] The authors acknowledge that Python code does not produce exactly the same results as the MATLAB. They argue that this is mostly due to differences in how Delaunay triangulation and extrapolation are implemented by the external packages used to do these steps. This argument is plausible but it is not yet convincing. Is there some way the authors can prove that this is the cause of the differences, or at least demonstrate it more quantitatively? See also [8] below.*

We have adjusted the explanation as follows and added an appendix (D) to the manuscript that provides an improved and more detailed quantitative explanation and comparison of this issue.

**L327-332. Spatial patterns in distribution of outliers shown in Fig. 4 appear to reflect locations where more edge-of-grid biogeochemical measurements were collected (e.g., near coasts and in deep waters). Hence, these locations aligned well with places where coefficients were extrapolated in MATLAB for use in PyESPER\_LIRs, compared to interpolations with far away “dummy points” within MATLAB ESPER\_LIRs (see Sect. 2.1.1, “Locally interpolated regressions”; Figs. 3, 4, and 5; for w Fig. B2 and B3). Within regions where MATLAB and Python were interpolating similarly, far outliers were uncommon (Figs. 3, 4, 5, B2, and B3).**

*[5] Continuing on the above, I am worried about the word “most” (“this diKerence in implementation is the source of most disagreements”; line 87). This implies that there remain some diKerences that cannot be explained in this way, which presumably points to bugs in the code? See also [9] below.*

**This choice of wording was indeed misleading, as we believe the interpolation differences beyond machine precision to be entirely due to interpolation differences. See the corrected wording below (simply omitting the word “most”):**

**L107-109. The three-dimensional interpolation algorithm is implemented differently in MATLAB and Python, and although both calculations are valid, this difference in implementation is the source of disagreements we find and later quantify between ESPER and PyESPER.**

*[6] The test dataset does include some additional cruises that were not part of the training set but it is not really independent. The additional cruises will have been assessed for consistency with the existing GLODAP product and potentially had their values adjusted to match better.*

**This is true. However, the GLODAP dataset was also used to validate ESPERs, which was our rationale for choosing this dataset. In future updates, we plan to also validate both ESPERs and PyESPERs against other datasets and potentially model results in an independent analysis.**

*[7] If I understood Section 3.1.1 correctly (especially lines 260-264), the ‘extrapolation’ areas generally had bigger diKerences than the ‘interpolation’ areas. This is puzzling. My*

*2*  
*understanding from Section 2.1.1 (lines 110-128) was that the Python implementation does not extrapolate itself, but rather reads a from saved output for the extrapolation regions generated by the MATLAB implementation. If that’s right, then surely these regions should agree very well with each other, because Python is just copying MATLAB directly rather than doing the calculations internally? Perhaps I have misunderstood the explanations – in which case the corresponding text should be made clearer.*

**This is a good point and a complicated issue, but it is important to note that Python is not copying MATLAB directly. We have added more information about what the two ESPER versions are doing below and in Appendix D.**

**MATLAB ESPER\_LIR: The grid is expanded vastly (to very large numbers) in order to avoid extrapolation.**

**Python PyESPER\_LIR: The above method resulted in extremely different values due to different triangulation methods in Python. Instead, we extrapolated the grid within MATLAB and used this larger, extrapolated grid to interpolate within Python. After extensive testing of many methods, this was the closest agreement method possible.**

**Please note that in updates we hope to find interpolation methods that match precisely between MATLAB and Python.**

*[8] From Figure 2, some of the diKerences are really rather large (e.g. up to 200  $\mu\text{mol/kg}$  in DIC, 0.5 in pH). Without further evidence I find it hard to understand how or accept that such a large diKerence could really be due to diKerences in how Delaunay triangles are calculated. A clearer explanation of this would be appreciated.*

**Please see the above comments and addition of Appendix D and the table of differences below for a randomly created variable with values between 1-10. Because neural networks agreed to within machine precision, and we have noted these differences between interpolation for the two languages, we can conclude that indeed the interpolation methods introduced the differences.**

**Table D1: Comparison of differences between MATLAB interpolations and extrapolations and Python results (all interpolations).**

|                           | <b>MATLAB Interpolation -<br/>Python Interpolation</b> | <b>MATLAB Extrapolation -<br/>Python Interpolation</b> |
|---------------------------|--------------------------------------------------------|--------------------------------------------------------|
| <b>Mean</b>               | <b>0.0004</b>                                          | <b>-0.6693</b>                                         |
| <b>Standard Deviation</b> | <b>0.9559</b>                                          | <b>5.2088</b>                                          |
| <b>Max</b>                | <b>2.2582</b>                                          | <b>13.3083</b>                                         |
| <b>Min</b>                | <b>-2.4593</b>                                         | <b>-15.6633</b>                                        |

*[9] Were this being released as a data product, then the issues above would be less important, because of the validation against the GLODAP dataset for example. However, this is a tool intended for users to calculate things with untested sets of input conditions. If some part of the diKerences between implementations are due to bugs in the code, they cannot be written oK just because they're fairly small in these tests, because they could easily have a much bigger eKect with a diKerent set of inputs. In order to have confidence in the results, any unexpected behaviour or diKerences between implementations above the level of computer precision must be really thoroughly understood.*

**This is a valid point, which we believe we have addressed through addition of Appendix D.**

### *Code quality*

**Please note that this review is due in the next few days, but we plan on more thoroughly addressing all of these code issues in the next week. Please do not hesitate to email us if you wish to check in!**

*[10] I was able to get the example code to run but it still required some troubleshooting and corrections to the code beyond the instructions given in the README. These were mostly related to defining and concatenating file paths (which can more robustly and conveniently be done with `os.path.join` rather than by manually manipulating strings). I have made a pull request (PR) to the GitHub repo which contains these and some other (see [11]) fixes (<https://github.com/LarissaMDias/PyESPER/pull/1>).*

**Thank you for the useful comments. We have accepted and merged this pull request.**

*[11] Parts of the code are very difficult to follow. This makes me worry more about points [5] and [9] above. The most critical issues are:*

**We agree that (as marine chemists) we have no formal training in coding and the code may be sloppy. We thank you for your careful edits!**

- The functions needed are in a Jupyter notebook, so they can't be imported and used in other workflows.*

**We now have .py modules available and are near-completion of packaging. We have also completely eliminated the JupyterNotebooks from the repository.**

- There are two notebooks both with copies of these functions – there should only be one “source of truth”.*

**We now have only one copy of each function.**

- Variables are defined, renamed and copied without clear reasons why, making it easy to lose track of which version of a variable should be used for the next step of the calculation.*

**We are working on close editing of code and variables within, for a more streamlined code in the final version.**

- The deprecated seawater package is used instead of its well-maintained successor gsw.*

**This is done for consistency with the current MATLAB version, but will be changed to the gsw package for future updates. We will also work on including an option in this version for users to go ahead and use the gsw package for users who do not wish to compare results to current MATLAB versions.**

- *It's virtually never necessary to explicitly use global variables in Python and best practice to avoid doing so.*

**Thank you, we will remove unnecessary global variables.**

- *Numerical data appear to be processed into strings at some points?*

**Some of the functions used required string formatting; however, we will look into whether there is an improved solution for this that does not require string formatting.**

*Some more minor points that would improve things:*

- *Variables are converted between dicts and pandas DataFrames, and lists and numpy arrays, often without any clear reason. Both for code clarity and*

*3*

*computational speed, numerical data should be kept as numpy arrays throughout, and dicts promoted to DataFrames only when essential.*

**Thank you for these tips. We will indeed reformat to this recommendation.**

- *Some packages are imported and not used (e.g., decimal).*

**We will eliminate these.**

- *Some variables are defined and never used.*

**This is odd, but a thorough comb-through of the code will help.**

- *Sometimes multiple packages are used where one would be more efficient (e.g., using math and statistics for some calculations that should all be done with numpy).*

**Thank you for the advice. We will try to use fewer packages for our calculations in the final version.**

- *The code could be run through a linter / auto-styler (e.g. RuK, Black) to make it more readable and help locate some of the issues noted above.*

**This is a good idea, and we will execute this once we have finished all preliminary editing.**

*The PR I made to the GitHub repo (see [10]) also contains fixes for some, but not all, of the points above, and I'd be happy to discuss with the authors further on how to tackle*

*any of these issues if that might be useful.*

**We thank you and will work with you to make this more user-friendly. Even though we are still working on making these changes, please feel free to check up through email.**

*[12] Following from [10], the authors note that the Python code runs significantly slower than the MATLAB. I suspect the frequent reliance on looping calculations through lists, which is known to be very slow in Python, rather than vectorising calculations across numpy arrays, may be largely responsible for this. Operations on pandas DataFrames can also be a lot slower than the equivalent with a dict or numpy array.*

**We have rewritten this section and table; most of our issues stemmed from using JupyterNotebooks. However, we will consider your above comments for even greater speed.**

*[13] For this to be really considered “available” in Python it needs at the very least to be packaged properly and installable from the GitHub repo with pip. Functions in Jupyter notebooks are not useful for integrating into other workflows. Given my comments in [1], that this manuscript is really about the code, I think that should be a bare minimum for publication.*

**We thank you and will make it installable with pip once code editing is finished.**

*[14] Uploading to PyPI and conda-forge would be very useful additional steps, although not critical for publishing this manuscript.*

**We agree and will also plan on doing this, with less time constraint than the aforementioned recommendations.**

### *Minor comments*

*[15] Figure 2: the y-axis scales have very unusual intervals, which does make it harder to interpret the figures.*

**We have changed the y-axis scales of Figure 2 to be much more readable, and whole-number intervals when possible.**

*[16] Line 261-262: presumably “these locations” refers to the “exceptions” from the previous sentence rather than the “most ocean regions”, but this is not clear.*

**We have altered the language to “these exceptionally different locations”**

*[17] The version number 1.01.01 is quite unusual. Of course it’s the authors’ prerogative to use whatever system they like, but I would suggest considering switching to the very widely used semantic versioning (<https://semver.org>) to make it easier to interpret.*

**If we understood correctly, all version numbers for this initial release should (and have been) altered to 1.0.0.**

*[18] For the examples, you could consider using <https://github.com/mvdh7/glodap> to import the GLODAP dataset (this automatically downloads the files if the user doesn't have them). I included an example script in my PR (see [10]) which shows how this could be implemented.*

**We thank you for the information and have included this method in our examples, rather than prior downloaded datasets.**
