# Supplementary material for: PyESPERv1.01.01: A Python implementation of empirical seawater property estimation routines (ESPERs)
Source: Copernicus journal article supplement (doi:10.5194/egusphere-2025-458), 2025-04-11
Supplement: Supplementary file [file egusphere-2025-458-RC1-supplement.pdf]

Overall great. The first iteration of this in Matlab was already sound in my opinion so this translation requires less scrutiny. I have not run the code myself, and although it would be intensive, I believe the accessibility would improve significantly if there is a possibility for a computer scientist to create a simple UI for either packages.

40 - Should add note of the potential high error when using a model to estimate a variable then used to calculate carbonate chemistry parameter without nutrient information too

50 - I would argue that it may not be considered entirely findable for many scientists who are not coding competent and even those who are, are likely unaware of the Zenodo and GitHub repositories though I recognize that is not entirely your responsibility

68 - If all models perform comparably then why is there a need for all three why not just use the mixed as an ensemble prediction

100 - if there's inadequate data number and the area size is doubled, does the output indicate this? Has it been checked if this correlates with an increase in error? Why is it jumping straight to double instead of small increase intervals?

160/172 - Should add a caveat that in addition to not predicting past 2030 they should not be used in areas with abnormal atmospheric CO<sub>2</sub> absorption or profiles ie. upwelling, coastal areas, high freshwater outflow mentioned in 261 and may seem obvious to some but not others
